# Supplementary figures and images for: Synergistic effect of 2′-fucosyllactose and osteopontin on intestinal mucosal immunity injury
Source: Royal Society of Chemistry journal article supplement (doi:10.1039/d4fo05287k), 2025-01-01

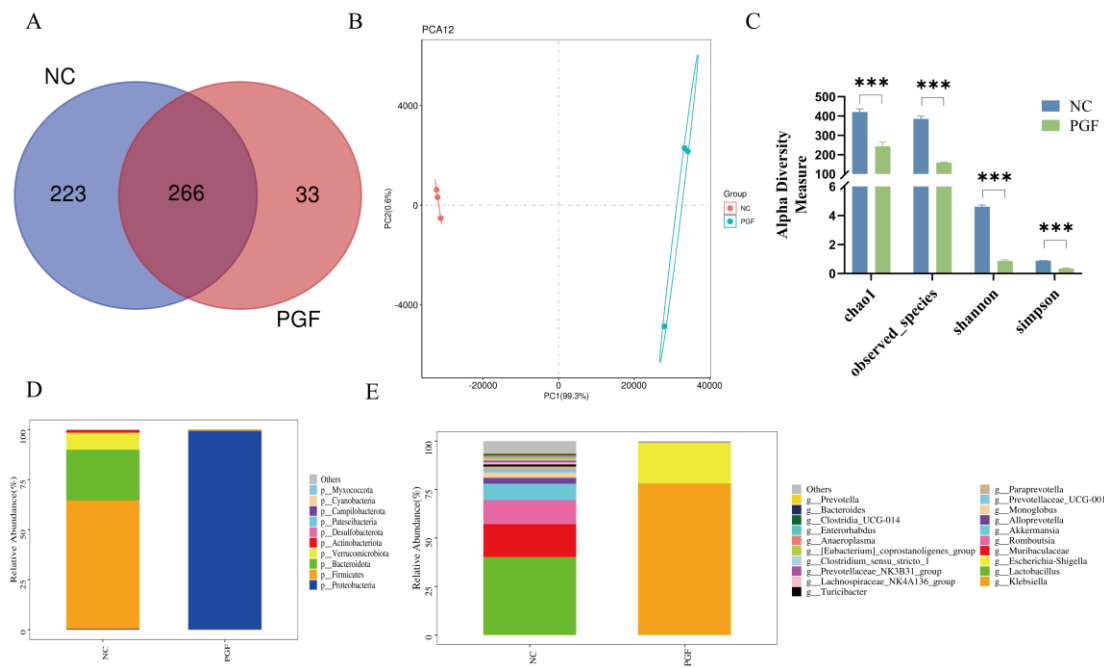

Supplement: d4fo05287k2.pdf [file d4fo05287k2.pdf]
